# Supplementary material for: Systems science and systems thinking for public health: a systematic review of the field
Source: HighWire-hosted journal article supplement (doi:10.1136/bmjopen-2015-009002), 2015-12-01
Supplement: bmjopen-2015-009002supp.pdf [file bmjopen-2015-009002supp.pdf]

- Adam, T., de Savigny, D., 2012. Systems thinking for strengthening health systems in LMICs: need for a paradigm shift. *Health Policy and Planning* 27, iv1–iv3. doi:10.1093/heapol/czs084
- Adam, T., Hsu, J., de Savigny, D., Lavis, J.N., Rottingen, J.-A., Bennett, S., 2012. Evaluating health systems strengthening interventions in low-income and middle-income countries: are we asking the right questions? *Health Policy and Planning* 27, iv9–iv19. doi:10.1093/heapol/czs086
- Araz, O.M., 2013. Integrating complex system dynamics of pandemic influenza with a multi-criteria decision making model for evaluating public health strategies. *Journal of Systems Science and Systems Engineering* 22, 319–339. doi:10.1007/s11518-013-5220-y
- Bar-Yam, Y., 2006. Improving the effectiveness of health care and public health: a multiscale complex systems analysis. *American Journal of Public Health* 96, 459.
- BeLue, R., Carmack, C., Myers, K.R., Weinreb-Welch, L., Lengerich, E.J., 2012. Systems thinking tools as applied to community-based participatory research a case study. *Health Education & Behavior* 39, 745–751.
- Best, A., 2003. Health Promotion Dissemination and Systems Thinking: Towards an Integrative Model. *American Journal of Health Behavior* 27, S206.
- Birckmayer, J., Fisher, D.A., Holder, H.D., Yacoubian, G.S., 2008. Prevention of Methamphetamine Abuse: Can Existing Evidence Inform Community Prevention? *Journal of Drug Education* 38, 147–165. doi:10.2190/DE.38.2.d
- Bishai, D., Paina, L., Li, Q., Peters, D.H., Hyder, A., 2014. Advancing the application of systems thinking in health: why cure crowds out prevention. *Health Res Policy Syst* 12, 10–1186.
- Black, M.M., Hager, E.R., 2013. Commentary: Pediatric Obesity: Systems Science Strategies for Prevention. *Journal of Pediatric Psychology* 38, 1044–1050. doi:10.1093/jpepsy/jst071
- Bocoum, F.Y., Kouanda, S., Kouyaté, B., Hounton, S., Adam, T., 2013. Exploring the effects of task shifting for HIV through a systems thinking lens: the case of Burkina Faso. *BMC public health* 13, 997.
- Borland, R., Young, D., Coghill, K., Ying Zhang, J., 2010. The Tobacco Use Management System: Analyzing Tobacco Control From a Systems Perspective. *American Journal of Public Health* 100, 1229–1236.
- Bures, R.M., Mabry, P.L., Orleans, C.T., Esposito, L., 2014. Systems Science: A Tool for Understanding Obesity. *American journal of public health* 104, 1156–1156.
- Burke, J.G., Lich, K.H., Neal, J.W., Meissner, H.I., Yonas, M., Mabry, P.L., 2014. Enhancing Dissemination and Implementation Research Using Systems Science Methods. *International Journal of Behavioral Medicine*. doi:10.1007/s12529-014-9417-3
- Burnet, M., 2008. Sustainability science: an integrated approach for health-programme planning. *The Lancet* 372, 1579–1589.
- Cavana, R.Y., Clifford, L.V., 2006. Demonstrating the utility of system dynamics for public policy analysis in New Zealand: the case of excise tax policy on tobacco. *System Dynamics Review* 22, 321–348. doi:10.1002/sdr.347

- Cavana, R.Y., Tobias, M., 2009. Integrative system dynamics: analysis of policy options for tobacco control in New Zealand. *Systems Research and Behavioral Science* 25, 675–694. doi:10.1002/sres.934
- Christens, B.D., Hanlin, C.E., Speer, P.W., 2007. Getting the social organism thinking: strategy for systems change. *American Journal of Community Psychology* 39, 229–238. doi:10.1007/s10464-007-9119-y
- Chuang, S., Howley, P.P., Lin, S.-H., 2015. Implementing systems thinking for infection prevention: The cessation of repeated scabies outbreaks in a respiratory care ward. *American Journal of Infection Control*. doi:10.1016/j.ajic.2015.02.002
- Delgado, J., Pollard, S., Snary, E., Black, E., Prpich, G., Longhurst, P., 2013. A Systems Approach to the Policy-Level Risk Assessment of Exotic Animal Diseases: Network Model and Application to Classical Swine Fever: Systems Approach to the Policy-Level Risk Assessment of Exotic Animal Diseases. *Risk Analysis* 33, 1454–1472. doi:10.1111/j.1539-6924.2012.01934.x
- De Savigny, D., Adam, T., Alliance for Health Policy and Systems Research., World Health Organization., 2009. Systems thinking for health systems strengthening. Alliance for Health Policy and Systems Research : World Health Organization, Geneva.
- Fahey, D.K., Carson, E.R., Cramp, D.G., Muir Gray, J.A., 2004. Applying systems modelling to public health. *Systems Research and Behavioral Science* 21, 635–649. doi:10.1002/sres.602
- Fallah-Fini, S., Rahmandad, H., Huang, T.T.-K., Bures, R.M., Glass, T.A., 2014. Modeling US adult obesity trends: a system dynamics model for estimating energy imbalance gap. *American journal of public health* 104, 1230–1239.
- Fawkes, S., 2013.  Leadership for systems change in preventive health - Review of the literature and current activity. Victorian Department of Health, Victoria, Australia.
- Finegood, D., 2011. The Complex Systems Science of Obesity, in: Crawley, J. (Ed.), *The Oxford Handbook of the Social Science of Obesity*., Oxford Handbooks Series. Oxford University Press, Oxford, pp. 208–236.
- Fisher, M., Milos, D., Baum, F., Friel, S., 2014. Social determinants in an Australian urban region: a “complexity” lens. *Health Promotion International*. doi:10.1093/heapro/dau071
- Galea, S., Hall, C., Kaplan, G.A., 2009. Social epidemiology and complex system dynamic modelling as applied to health behaviour and drug use research. *International Journal of Drug Policy* 20, 209–216. doi:10.1016/j.drugpo.2008.08.005
- Galea, S., Riddle, M., Kaplan, G.A., 2010. Causal thinking and complex system approaches in epidemiology. *International Journal of Epidemiology* 39, 97–106. doi:10.1093/ije/dyp296
- Ghaffarzadegan, N., Lyneis, J., Richardson, G.P., 2010. How small system dynamics models can help the public policy process. *System Dynamics Review n/a–n/a*. doi:10.1002/sdr.442
- Gilson, L., Elloker, S., Olckers, P., Lehmann, U., 2014. Advancing the application of systems thinking in health: South African examples of a leadership of sensemaking for primary health care. *Health Res Policy Syst* 12, 10–1186.

- Gortmaker, S.L., Swinburn, B.A., Levy, D., Carter, R., Mabry, P.L., Finegood, D.T., Huang, T., Marsh, T., Moodie, M.L., 2011. Changing the future of obesity: science, policy, and action. *The Lancet* 378, 838–847.
- Green, L.W., 2006. Public health asks of systems science: to advance our evidence-based practice, can you help us get more practice-based evidence? *American Journal of Public Health* 96, 406.
- Hamdani, Y., Jetha, A., Norman, C., 2011. Systems thinking perspectives applied to healthcare transition for youth with disabilities: a paradigm shift for practice, policy and research: Systems thinking perspectives for healthcare transition. *Child: Care, Health and Development* 37, 806–814. doi:10.1111/j.1365-2214.2011.01313.x
- Hammond, R.A., 2009. Complex systems modeling for obesity research. *Preventing chronic disease* 6.
- Hammond, R.A., 2008. A complex systems approach to understanding and combating the obesity epidemic. Citeseer.
- Hassmiller Lich, K., Osgood, N.D., Mahamoud, A., 2010. Using System Dynamics tools to gain insight into intervention options related to the interaction between tobacco and tuberculosis. *Global Health Promotion* 17, 07–20. doi:10.1177/1757975909358255
- Have, D.W.A., 2010. System Science: A Revolution in Public Health Policy Research.
- Hawe, P., 2014. Lessons from Complex Interventions to Improve Health. *Annual Review of Public Health* 36, Online First. doi:10.1146/annurev-publhealth-031912-114421
- HIAP, 2013. HEALTH IN ALL POLICIES.
- Hirsch, G., Homer, J., Evans, E., Zielinski, A., 2010. A system dynamics model for planning cardiovascular disease interventions. *American journal of public health* 100, 616.
- Huang, T.T.-K., Grimm, B., Hammond, R.A., 2011. A Systems-Based Typological Framework for Understanding the Sustainability, Scalability, and Reach of Childhood Obesity Interventions. *Children's Health Care* 40, 253–266. doi:10.1080/02739615.2011.590399
- Ip, E.H., Rahmandad, H., Shoham, D.A., Hammond, R., Huang, T.T.-K., Wang, Y., Mabry, P.L., 2013. Reconciling statistical and systems science approaches to public health. *Health Education & Behavior* 40, 123S–131S.
- Iwelunmor, J., Airhihenbuwa, C.O., Cooper, R., Tayo, B., Plange-Rhule, J., Adanu, R., Ogedegbe, G., 2014. Prevalence, determinants and systems-thinking approaches to optimal hypertension control in West Africa. *Globalization and health* 10, 42.
- Jayasinghe, S., 2011. Conceptualising population health: from mechanistic thinking to complexity science. *Emerg Themes Epidemiol* 8, 1–7.
- Johnston, L.M., Finegood, D.T., 2015. Cross-Sector Partnerships and Public Health: Challenges and Opportunities for Addressing Obesity and Noncommunicable Diseases Through Engagement with the Private Sector. *Annual Review of Public Health* 36, 255–271. doi:10.1146/annurev-publhealth-031914-122802
- Johnston, L.M., Matteson, C.L., Finegood, D.T., 2014. Systems Science and Obesity Policy: A Novel Framework for Analyzing and Rethinking Population-Level Planning. *American journal of public health* e1–e9.

- Kok, S., Rutherford, A.R., Gustafson, R., Barrios, R., Montaner, J.S.G., Vasarhelyi, K., 2014. Optimizing an HIV testing program using a system dynamics model of the continuum of care. *Health Care Management Science*. Online first doi:10.1007/s10729-014-9312-0
- Kroelinger, C.D., Rankin, K.M., Chambers, D.A., Diez Roux, A.V., Hughes, K., Grigorescu, V., 2014. Using the Principles of Complex Systems Thinking and Implementation Science to Enhance Maternal and Child Health Program Planning and Delivery. *Maternal and Child Health Journal* 18, 1560–1564. doi:10.1007/s10995-014-1586-9
- Kwamie, A., Dijk, H. van, Agyepong, I., 2014. Advancing the application of systems thinking in health: realist evaluation of the Leadership Development Programme for district manager decision-making in Ghana. *Health Research Policy and Systems* 12, 29. doi:10.1186/1478-4505-12-29
- Lang, T., Rayner, G., 2007. Overcoming policy cacophony on obesity: an ecological public health framework for policymakers. *Obesity reviews* 8, 165–181.
- Leischow, S.J., Best, A., Trochim, W.M., Clark, P.I., Gallagher, R.S., Marcus, S.E., Matthews, E., 2008. Systems Thinking to Improve the Public's Health. *American Journal of Preventive Medicine* 35, S196–S203. doi:10.1016/j.amepre.2008.05.014
- Leischow, S.J., Milstein, B., 2006. Systems thinking and modelling for Public Health Practice. *American Journal of Public Health* 96, 403–405.
- Levy, B.S., Sidel, V.W., 2006. *Social injustice and public health*. Oxford University Press, New York.
- Lich, K.H., Ginexi, E.M., Osgood, N.D., Mabry, P.L., 2013. A Call to Address Complexity in Prevention Science Research. *Prevention Science* 14, 279–289. doi:10.1007/s11121-012-0285-2
- Liu, A., 2015. Research on Resilience of Emergency Logistics Network Responding to Public Health Emergencies Based on System Dynamics. *Journal of Information and Computational Science* 12, 1001–1010. doi:10.12733/jics20105432
- Livingood, W.C., Allegrante, J.P., Airhihenbuwa, C.O., Clark, N.M., Windsor, R.C., Zimmerman, M.A., Green, L.W., 2011. Applied Social and Behavioral Science to Address Complex Health Problems. *American Journal of Preventive Medicine* 41, 525–531. doi:10.1016/j.amepre.2011.07.021
- Luke, D.A., Stamatakis, K.A., 2012. Systems Science Methods in Public Health: Dynamics, Networks, and Agents. *Annual Review of Public Health* 33, 357–376. doi:10.1146/annurev-publhealth-031210-101222
- Luke, D.A., Wald, L.M., Carothers, B.J., Bach, L.E., Harris, J.K., 2013. Network influences on dissemination of evidence-based guidelines in state tobacco control programs. *Health Education & Behavior* 40, 33S–42S.
- Mabry, P., 2010. Systems Science: A Revolution in Public Health Policy Research. *American Journal of Public Health* 100.
- Mabry, P.L., 2011. Making Sense of the Data Explosion. *American Journal of Preventive Medicine* 40, S159–S161. doi:10.1016/j.amepre.2011.02.001
- Mabry, P.L., Bures, R.M., 2014. Systems Science for Obesity-Related Research Questions: An Introduction to the Theme Issue. *American journal of public health* 104, 1157–1159.
- Mabry, P.L., Kaplan, R.M., 2013. Systems Science A Good Investment for the Public's Health. *Health Education & Behavior* 40, 9S–12S.

- Mabry, P.L., Olster, D.H., Morgan, G.D., Abrams, D.B., 2008. Interdisciplinarity and Systems Science to Improve Population Health. *American Journal of Preventive Medicine* 35, S211–S224. doi:10.1016/j.amepre.2008.05.018
- MacLean, L.M., Clinton, K., Edwards, N., Garrard, M., Ashley, L., Hansen-Ketchum, P., Walsh, A., 2010. Debate Unpacking vertical and horizontal integration: childhood overweight/obesity programs and planning, a Canadian perspective.
- Maglio, P.P., Mabry, P.L., 2011. Agent-Based Models and Systems Science Approaches to Public Health. *American Journal of Preventive Medicine* 40, 392–394. doi:10.1016/j.amepre.2010.11.010
- Maglio, P.P., Sepulveda, M.-J., Mabry, P.L., 2014. Mainstreaming modeling and simulation to accelerate public health innovation. *American journal of public health* 104, 1181–1186.
- Mahamoud, A., Roche, B., Homer, J., 2013. Modelling the social determinants of health and simulating short-term and long-term intervention impacts for the city of Toronto, Canada. *Social Science & Medicine* 93, 247–255. doi:10.1016/j.socscimed.2012.06.036
- Manion, H., 2015. International Social Problems: A Systems Perspective, in: Wright, D. (Ed.), *Perspective International Encyclopedia of the Social & Behavioral Sciences*. Elsevier, Oxford, pp. 542–549.
- Mann, R., Smart, E., Reginald, G., 2000. Investigating the impact of high-risk programs on aggregate problem indicators. *Addiction* 95, 60–65.
- Marcus, S.E., Leischow, S.J., Mabry, P.L., Clark, P.I., 2010. Lessons Learned From the Application of Systems Science to Tobacco Control at the National Cancer Institute. *American Journal of Public Health* 100, 1163–1164.
- Marshall, B.D.L., Galea, S., 2015. Formalizing the Role of Agent-Based Modeling in Causal Inference and Epidemiology. *American Journal of Epidemiology* 181, 92–99. (accessed online in 2014) doi:10.1093/aje/kwu274
- McKelvie, D., Wolstenholme, E., Arnold, S., Monk, D., 2011. Using System Dynamics to Plan Investment in Alcohol Services. The Symmetric Partnership, UK.
- Méndez, D., 2010. A SYSTEMS APPROACH TO A COMPLEX PROBLEM. *American Journal of Public Health* 100, 1160–1160. doi:10.2105/AJPH.2010.199877
- Metcalf, S.S., Northridge, M.E., Widener, M.J., Chakraborty, B., Marshall, S.E., Lamster, I.B., 2013. Modeling social dimensions of oral health among older adults in urban environments. *Health Education & Behavior* 40, 63S–73S.
- Mlakar, T., Mulej, M., 2007. COMPLEMENTARITY OF THE LIVING SYSTEMS AND THE DIALECTICAL SYSTEMS THEORIES: THE CASE OF PUBLIC MEDICAL CARE IN SLOVENIA. *Cybernetics and Systems: An International Journal* 38, 381–399.
- Mundt, M.P., 2013. Social network analysis of peer effects on binge drinking among US adolescents, in: *Social Computing, Behavioral-Cultural Modeling and Prediction*. Springer, pp. 123–134.
- Newell, B., Proust, K., Dyball, R., McManus, P., 2007. Seeing obesity as a systems problem. *New South Wales Public Health Bulletin* 18, 214. doi:10.1071/NB07028

- Newton, J.T., Bower, E.J., 2005. The social determinants of oral health: new approaches to conceptualizing and researching complex causal networks. *Community dentistry and oral epidemiology* 33, 25–34.
- Norman, C.D., 2009. Health promotion as a systems science and practice. *Journal of Evaluation in Clinical Practice* 15, 868–872. doi:10.1111/j.1365-2753.2009.01273.x
- Norman, C.D., Charnaw-Burger, J., Yip, A.L., Saad, S., Lombardo, C., 2010. Designing health innovation networks using complexity science and systems thinking: the CoNEKTR model: Designing health innovation: the CoNEKTR model. *Journal of Evaluation in Clinical Practice* 16, 1016–1023. doi:10.1111/j.1365-2753.2010.01534.x
- Palmer, R.H.C., McGeary, J.E., Francazio, S., Raphael, B.J., Lander, A.D., Heath, A.C., Knopik, V.S., 2012. The genetics of alcohol dependence: Advancing towards systems-based approaches. *Drug and Alcohol Dependence* 125, 179–191. doi:10.1016/j.drugalcdep.2012.07.005
- Pauly, B.B., MacDonald, M., Hancock, T., Martin, W., Perkin, K., 2013. Reducing health inequities: the contribution of core public health services in BC. *BMC public health* 13, 550.
- Peters, D.H., 2014. The application of systems thinking in health: why use systems thinking. *Health Res Policy Syst* 12, 51.
- Prashanth, N.S., Marchal, B., Devadasan, N., Kegels, G., Criel, B., 2014. Advancing the application of systems thinking in health: a realist evaluation of a capacity building programme for district managers in Tumkur, India. *Health Research Policy and Systems* 12, 42.
- Rehfuess, E.A., Best, N., Briggs, D.J., Joffe, M., 2013. Diagram-based Analysis of Causal Systems (DACs): elucidating inter-relationships between determinants of acute lower respiratory infections among children in sub-Saharan Africa. *Emerging themes in epidemiology* 10, 13.
- Resnicow, K., Page, S.E., 2008. Embracing chaos and complexity: a quantum change for public health. *American journal of public health* 98, 1382.
- Retrum, J.H., Chapman, C.L., Varda, D.M., 2013. Implications of network structure on public health collaboratives. *Health Education & Behavior* 40, 13S–23S.
- Reynolds, J., 2013. Hospital charitable lotteries: taking a gamble on systems thinking: Hospital charitable lotteries. *Journal of Evaluation in Clinical Practice* 19, 1090–1094. doi:10.1111/jep.12066
- Riley, B., Norman, C.D., Best, A., 2012. Knowledge integration in public health: a rapid review using systems thinking. *Evidence & Policy: A Journal of Research, Debate and Practice* 8, 417–431. doi:10.1332/174426412X660089
- Roux, A.D., 2011. Complex systems thinking and current impasses in health disparities research. *American journal of public health* 101, 1627–1634.
- Rydin, Y., Bleahu, A., Davies, M., Dávila, J.D., Friel, S., De Grandis, G., Groce, N., Hallal, P.C., Hamilton, I., Howden-Chapman, P., others, 2012. Shaping cities for health: complexity and the planning of urban environments in the 21st century. *The Lancet* 379, 2079–2108.
- Sabounchi, N.S., Hovmand, P.S., Osgood, N.D., Dyck, R.F., Jungheim, E.S., 2014. A novel system dynamics model of female obesity and fertility. *American journal of public health* 104, 1240–1246.

- Sautkina, E., Goodwin, D., Jones, A., Ogilvie, D., Petticrew, M., White, M., Cummins, S., 2014. Lost in translation? Theory, policy and practice in systems-based environmental approaches to obesity prevention in the Healthy Towns programme in England. *Health & Place* 29, 60–66.  
doi:10.1016/j.healthplace.2014.05.006
- Schaefer, D.R., Haas, S.A., others, 2013. Social Networks and Smoking Exploring the Effects of Peer Influence and Smoker Popularity Through Simulations. *Health Education & Behavior* 40, 24S–32S.
- Shiell, A., Hawe, P., Gold, L., 2008. Complex interventions or complex systems? Implications for health economic evaluation. *British Medical Journal* 336, 1281–1283.
- Silverman, B.G., Hanrahan, N., Bharathy, G., Gordon, K., Johnson, D., 2015. A systems approach to healthcare: Agent-based modeling, community mental health, and population well-being. *Artificial Intelligence in Medicine* 63, 61–71. Accessed online 2014  
doi:10.1016/j.artmed.2014.08.006
- Skinner, A.C., Foster, E.M., 2013. Systems Science and Childhood Obesity: A Systematic Review and New Directions. *Journal of Obesity* 2013, 1–10.  
doi:10.1155/2013/129193
- Sturmberg, J.P., Martin, C.M., Katerndahl, D.A., 2014. Systems and Complexity Thinking in the General Practice Literature: An Integrative, Historical Narrative Review. *The Annals of Family Medicine* 12, 66–74.  
doi:10.1370/afm.1593
- Tawileh, A., Almagwashi, H., McIntosh, S., 2008. A system dynamics approach to assessing policies to tackle alcohol misuse, in: *Proceedings of the 26th International Conference of the System Dynamics Society*, Dangerfield BC.(ed.). [Http://systemdynamics.org/conferences/2008/proceed/papers/TAWIL185.Pdf](http://systemdynamics.org/conferences/2008/proceed/papers/TAWIL185.Pdf) [5 May 2009].
- Tengs, T.O., Osgood, N.D., Chen, L.L., 2001. The Cost-Effectiveness of Intensive National School-Based Anti-Tobacco Education: Results from the Tobacco Policy Model. *Preventive Medicine* 33, 558–570.  
doi:10.1006/pmed.2001.0922
- Tobias, M.I., Cavana, R.Y., Bloomfield, A., 2010. Application of a system dynamics model to inform investment in smoking cessation services in New Zealand. *American journal of public health* 100, 1274.
- Trochim, W.M., Cabrera, D., 2005. The complexity of concept mapping for policy analysis. *Emergence: complexity and organization* 7, 11–22.
- Tubbing, L., Harting, J., Stronks, K., 2015. Unravelling the concept of integrated public health policy: Concept mapping with Dutch experts from science, policy, and practice. *Health Policy*. (Accessed online 2014)  
doi:10.1016/j.healthpol.2014.12.020
- Van Beurden, E.K., Kia, A.M., Zask, A., Dietrich, U., Rose, L., 2013. Making sense in a complex landscape: how the Cynefin Framework from Complex Adaptive Systems Theory can inform health promotion practice. *Health Promotion International* 28, 73–83. doi:10.1093/heapro/dar089
- Vandenbroeck, I., Goossens, J., Clemens, M., 2007. Foresight tackling obesities: future choices—obesity system atlas. Foresight Study, UK.

- Van Wave, T.W., Scutchfield, F.D., Honoré, P.A., 2010. Recent Advances in Public Health Systems Research in the United States. *Annual Review of Public Health* 31, 283–295. doi:10.1146/annurev.publhealth.012809.103550
- Wakeland, W., Nielsen, A., Schmidt, T.D., McCarty, D., Webster, L.R., Fitzgerald, J., Haddox, J.D., 2013. Modeling the Impact of Simulated Educational Interventions on the Use and Abuse of Pharmaceutical Opioids in the United States A Report on Initial Efforts. *Health Education & Behavior* 40, 74S–86S.
- Walton, M., 2014. Applying complexity theory: A review to inform evaluation design. *Evaluation and Program Planning* 45, 119–126. doi:10.1016/j.evalprogplan.2014.04.002
- Wang, Y., Xue, H., Esposito, L., Joyner, M.J., Bar-Yam, Y., Huang, T.T.-K., 2014. Applications of Complex Systems Science in Obesity and Noncommunicable Chronic Disease Research. *Advances in Nutrition: An International Review Journal* 5, 574–577. doi:10.3945/an.114.006650
- Weishaar, H., Amos, A., Collin, J., 2015. Capturing complexity: mixing methods in the analysis of a European tobacco control policy network. *International Journal of Social Research Methodology* 18, 175–192. (accessed online 2014) doi:10.1080/13645579.2014.897851
- Wiist, W.H., 2014. Use of complex systems modelling to strengthen public health's role in preventing war. *Medicine, Conflict and Survival* 30, 152–164. doi:10.1080/13623699.2014.922374
- Williams, W., Lyalin, D., Wingo, P.A., 2005. Systems thinking: what business modeling can do for public health. *Journal of Public Health Management and Practice* 11, 550–553.
- Young, D., 2010. An Actor-Network Theory Analysis of Policy Innovation for Smoke-Free Places: Understanding Change in Complex Systems. *Framing Health Matters* 100.
- Young, D., Borland, R., Coghill, K., 2012. Changing the Tobacco Use Management System: Blending Systems Thinking with Actor-Network Theory: Changing the Tobacco Use Management System. *Review of Policy Research* 29, 251–279. doi:10.1111/j.1541-1338.2011.00550.x
- Zainal Abidin, N., Mamat, M., Dangerfield, B., Zulkepli, J.H., Baten, M.A., Wibowo, A., 2014. Combating Obesity through Healthy Eating Behavior: A Call for System Dynamics Optimization. *PLoS ONE* 9, e114135. doi:10.1371/journal.pone.0114135
- Zarowsky, C., Haddad, S., Nguyen, V.-K., 2013. Beyond “vulnerable groups”: contexts and dynamics of vulnerability. *Global Health Promotion* 20, 3–9.
- Zosel, R., 2015. The Rise of Systems Thinking in Public Health. In *Touch* 15–16.
- Zulkepli, J., Abidin, N.Z., Zaibidi, N.Z., 2014. Obesity prevention: Comparison of techniques and potential solution.
